# Supplementary material for: Development and test of highly accurate endpoint free energy methods. 3: partition coefficient prediction using a Poisson–Boltzmann method combined with a solvent accessible surface area model for SAMPL challenges
Source: Royal Society of Chemistry journal article supplement (doi:10.1039/d3cp04174c), 2023-11-21
Supplement: d3cp04174c1.xlsx [file d3cp04174c1.xlsx]

## Sheet: Toluene
Table S1 Multiple conformations of solutes in training set to conduct linear regression. Same compound ID represents identical solute and conformation ID number each conformation for a solute.
CompoundID_ConformationID	∆Gexpt-∆GPB,calc (kcal/mol)	SASA (Å2)
ch008_10	-5.3022	367.777
ch008_11	-5.2991	367.22
ch008_12	-5.3072	360.15
ch008_13	-5.3078	361.272
ch008_14	-5.3063	361.501
ch008_15	-5.3128	360.271
ch008_16	-5.3066	360.222
ch008_17	-5.312	362.067
ch008_18	-5.3078	361.717
ch008_19	-5.3011	362.839
ch008_1	-5.2944	372.328
ch008_20	-5.3028	363.768
ch008_2	-5.3005	368.131
ch008_3	-5.3012	367.839
ch008_4	-5.3007	367.965
ch008_5	-5.3008	366.905
ch008_6	-5.3001	367.036
ch008_7	-5.3005	368.521
ch008_8	-5.3022	367.17
ch008_9	-5.3014	367.476
ch201_1	-3.6699	276.589
chn002_1	-0.9207	229.745
chn010_1	0.4965	172.18
chn011_1	0.1407	205.911
chn012_1	-0.6495	236.629
chn012_2	-0.9754	235.242
chn012_3	-0.779	232.922
chn013_1	-1.5041	268.31
chn013_2	-1.8243	266.581
chn013_3	-1.5734	264.125
chn013_4	-1.5385	263.808
chn013_5	-1.5131	263.565
chn013_6	-1.9132	261.016
chn013_7	-1.6196	257.98
chn013_8	-2.2142	256.649
chn013_9	-1.786	254.148
chn030_1	-0.2926	205.661
chn031_1	-1.6496	273.108
chn031_2	-1.6906	268.124
chn031_3	-1.6904	267.562
chn031_4	-1.5228	266.9
chn031_5	-1.5188	265.598
chn031_6	-1.5603	260.186
chn031_7	-1.5423	258.837
chn032_10	-3.251	329.945
chn032_11	-3.5766	323.758
chn032_12	-3.55	323.739
chn032_13	-3.2592	329.43
chn032_14	-3.8147	315.666
chn032_15	-3.8143	315.386
chn032_16	-3.5587	325.356
chn032_17	-3.0274	327.784
chn032_18	-3.5483	325.891
chn032_19	-3.041	328.098
chn032_1	-3.2079	335.633
chn032_20	-3.1295	321.702
chn032_2	-3.4022	333.118
chn032_3	-3.4312	332.699
chn032_4	-3.6562	325.473
chn032_5	-3.2914	329.82
chn032_6	-3.265	331.185
chn032_7	-3.4678	328.239
chn032_8	-3.4939	327.39
chn032_9	-3.349	323.752
chn110_1	-2.7041	265.667
chn112_1	-3.3033	298.147
chn140_1	-1.7874	239.254
cho052_1	-1.643	247.136
cho101_1	0.9458	162.952
cho102_1	-0.3854	198.553
cho103_1	-0.9283	231.006
cho103_2	-1.0138	230.13
cho103_3	-1.017	230.108
cho104_1	-1.5032	262.824
cho104_2	-1.6064	260.202
cho104_3	-1.5931	259.929
cho104_4	-1.5265	259.314
cho104_5	-1.5216	258.353
cho104_6	-1.658	256.245
cho104_7	-1.6652	255.213
cho104_8	-1.9085	252.47
cho104_9	-1.9118	253.103
cho105_10	-2.5109	288.667
cho105_11	-2.4688	287.392
cho105_12	-2.5005	287.136
cho105_13	-2.4285	283.055
cho105_14	-2.4032	284.03
cho105_15	-2.4834	288.411
cho105_16	-2.5043	280.617
cho105_17	-2.4717	281.775
cho105_18	-2.786	283.161
cho105_19	-2.7721	283.255
cho105_1	-2.4571	295.211
cho105_20	-2.9409	277.461
cho105_2	-2.4393	292.644
cho105_3	-2.4303	292.388
cho105_4	-2.3989	288.94
cho105_5	-2.396	289.187
cho105_6	-2.3934	289.959
cho105_7	-2.3914	291.234
cho105_8	-2.4946	287.098
cho105_9	-2.4732	286.604
cho106_10	-3.3746	321.239
cho106_11	-3.4386	316.28
cho106_12	-3.403	318.106
cho106_13	-3.4093	315.771
cho106_14	-3.3766	319.69
cho106_15	-3.3935	317.355
cho106_16	-3.3927	317.831
cho106_17	-3.4166	316.247
cho106_18	-3.4203	318.591
cho106_19	-3.421	319.982
cho106_1	-3.3607	322.904
cho106_20	-3.3526	312.162
cho106_2	-3.414	321.839
cho106_3	-3.4176	320.255
cho106_4	-3.3379	320.754
cho106_5	-3.3348	318.419
cho106_6	-3.3599	318.509
cho106_7	-3.3677	319.407
cho106_8	-3.3724	318.895
cho106_9	-3.457	316.384
cho107_10	-3.9851	351.848
cho107_11	-3.9976	352.724
cho107_12	-4.0815	348.498
cho107_13	-4.0481	351.328
cho107_14	-4.0549	350.017
cho107_15	-4.0403	351.723
cho107_16	-4.0072	349.623
cho107_17	-4.0358	348.26
cho107_18	-4.0198	350.332
cho107_19	-4.0373	351.88
cho107_1	-3.956	356.472
cho107_20	-4.0117	349.124
cho107_2	-4.0194	354.865
cho107_3	-4.0355	355.26
cho107_4	-3.979	350.682
cho107_5	-3.9784	351.229
cho107_6	-3.9696	352.935
cho107_7	-3.9646	351.417
cho107_8	-3.9495	351.939
cho107_9	-3.9606	353.092
cho350_1	-2.9475	259.594
cho352_1	-3.7522	284.928
cho354_1	-3.5684	290.786
cho503_1	-0.7041	219.568
cho505_10	-2.3163	273.072
cho505_11	-2.3144	274.153
cho505_12	-2.3651	274.283
cho505_13	-2.2645	279.714
cho505_14	-2.3676	274.615
cho505_15	-2.3225	274.498
cho505_16	-2.2591	278.198
cho505_17	-2.2639	278.005
cho505_18	-2.3366	281.431
cho505_19	-2.3371	281.494
cho505_1	-2.3899	279.812
cho505_20	-2.3885	274.61
cho505_2	-2.3954	273.314
cho505_3	-2.353	281.408
cho505_4	-2.3625	275.713
cho505_5	-2.3949	273.902
cho505_6	-2.3529	281.08
cho505_7	-2.3688	276.593
cho505_8	-2.2677	280.028
cho505_9	-2.3133	272.866
cho506_10	-2.9137	304.108
cho506_11	-2.8709	310.926
cho506_12	-2.9507	307.082
cho506_13	-2.9558	304.799
cho506_14	-2.9559	304.534
cho506_15	-2.9241	305.225
cho506_16	-2.9226	304.817
cho506_17	-2.9404	306.144
cho506_18	-2.8602	309.944
cho506_19	-2.8499	309.643
cho506_1	-2.9313	311.54
cho506_20	-2.9128	312.616
cho506_2	-2.915	312.983
cho506_3	-2.9215	313.024
cho506_4	-2.9783	307.566
cho506_5	-2.9698	306.88
cho506_6	-2.9734	307.613
cho506_7	-2.9726	306.25
cho506_8	-2.8666	310.437
cho506_9	-2.9108	302.825
cho507_10	-3.5645	342.595
cho507_11	-3.559	342.564
cho507_12	-3.6496	338.191
cho507_13	-3.5996	337.774
cho507_14	-3.6536	338.605
cho507_15	-3.6523	337.681
cho507_16	-3.6047	337.416
cho507_17	-3.6101	338.215
cho507_18	-3.5379	340.302
cho507_19	-3.5323	341.21
cho507_1	-3.6329	342.667
cho507_20	-3.6097	345.61
cho507_2	-3.6702	339.101
cho507_3	-3.6399	344.207
cho507_4	-3.6365	344.899
cho507_5	-3.677	339.73
cho507_6	-3.6811	338.192
cho507_7	-3.6643	337.156
cho507_8	-3.5949	336.101
cho507_9	-3.5939	334.977
cho531_1	-2.4591	288.91
cho531_2	-2.4736	288.665
cho531_3	-2.486	288.009
cho531_4	-2.4381	288.821
cho670_1	1.5285	200.673
cho671_10	-0.263	231.645
cho671_11	-0.2398	232.453
cho671_12	-0.2467	231.738
cho671_1	-0.2384	232.642
cho671_2	-0.2633	233.402
cho671_3	-0.2658	233.6
cho671_4	-0.3061	234.096
cho671_5	-0.3013	234.648
cho671_6	-0.2079	234.286
cho671_7	-0.278	234.029
cho671_8	-0.2129	233.873
cho671_9	-0.2698	233.361
cho672_10	-0.992	261.083
cho672_11	-1.0158	266.493
cho672_12	-0.9961	266.165
cho672_13	-0.9265	267.068
cho672_14	-0.9961	260.064
cho672_15	-0.9244	267.068
cho672_16	-0.9202	266.35
cho672_17	-0.9707	259.011
cho672_18	-0.9284	266.377
cho672_19	-0.9564	259.994
cho672_1	-1.0598	265.285
cho672_20	-0.8668	259.748
cho672_2	-1.0455	265.755
cho672_3	-1.0136	265.763
cho672_4	-1.0698	260.683
cho672_5	-1.0677	259.705
cho672_6	-1.1242	258.84
cho672_7	-1.1202	257.785
cho672_8	-0.9762	260.508
cho672_9	-1.0119	259.866
cho673_10	-1.6714	292.111
cho673_11	-1.6467	298.265
cho673_12	-1.5689	290.989
cho673_13	-1.6476	298.602
cho673_14	-1.5374	298.23
cho673_15	-1.5585	297.549
cho673_16	-1.5893	297.629
cho673_17	-1.5875	297.62
cho673_18	-1.7102	291.69
cho673_19	-1.7319	290.357
cho673_1	-1.644	296.058
cho673_20	-1.7019	291.34
cho673_2	-1.6468	296.724
cho673_3	-1.6665	296.194
cho673_4	-1.7299	292.245
cho673_5	-1.7468	292.164
cho673_6	-1.8015	290.16
cho673_7	-1.8293	289.401
cho673_8	-1.6757	292.205
cho673_9	-1.5337	291.501
cho674_10	-2.7176	322.061
cho674_11	-2.7456	322.389
cho674_12	-2.7177	327.605
cho674_13	-2.7025	327.699
cho674_14	-2.7412	327.032
cho674_15	-2.6119	327.495
cho674_16	-2.6374	327.534
cho674_17	-2.7196	327.049
cho674_18	-2.7534	322.588
cho674_19	-2.7395	322.385
cho674_1	-2.7719	326.811
cho674_20	-2.7433	322.677
cho674_2	-2.7425	327.612
cho674_3	-2.8168	323.017
cho674_4	-2.8223	322.084
cho674_5	-2.7621	327.32
cho674_6	-2.8749	321.048
cho674_7	-2.8651	321.165
cho674_8	-2.7243	323.12
cho674_9	-2.7089	321.855
cho711_1	-0.9712	236.395
cho711_2	-0.7885	237.573
cho711_3	-0.7902	237.581
cho711_4	-0.2664	236.506
cho711_5	-0.2896	236.919
cho712_10	-1.4464	263.901
cho712_11	-1.4958	268.26
cho712_12	-1.5014	261.107
cho712_13	-1.5169	260.802
cho712_14	-1.6618	261.07
cho712_15	-1.6586	261.447
cho712_16	-1.0959	269.423
cho712_17	-1.2055	263.514
cho712_18	-0.9799	258.567
cho712_19	-0.9328	260.483
cho712_1	-1.6641	265.45
cho712_20	-0.9352	258.45
cho712_2	-1.6597	265.329
cho712_3	-1.7753	262.26
cho712_4	-1.7729	262.075
cho712_5	-1.6368	270.353
cho712_6	-1.5982	264.243
cho712_7	-1.5963	264.278
cho712_8	-1.4505	263.718
cho712_9	-1.5331	269.564
cho713_10	-2.3583	297.518
cho713_11	-2.4384	286.149
cho713_12	-2.3029	296.914
cho713_13	-2.2713	292.634
cho713_14	-2.5117	282.116
cho713_15	-2.2751	292.634
cho713_16	-2.3056	296.977
cho713_17	-2.5174	282.098
cho713_18	-2.2777	292.921
cho713_19	-2.217	302.603
cho713_1	-2.3979	296.899
cho713_20	-2.2111	298.496
cho713_2	-2.3996	296.733
cho713_3	-2.4085	290.238
cho713_4	-2.4072	289.91
cho713_5	-2.4593	294.428
cho713_6	-2.3372	303.108
cho713_7	-2.458	293.745
cho713_8	-2.4317	286.284
cho713_9	-2.3613	291.658
cho714_10	-3.0559	325.37
cho714_11	-3.0787	322.626
cho714_12	-3.0173	317.985
cho714_13	-3.0138	318.08
cho714_14	-2.9067	322.26
cho714_15	-2.9846	328.056
cho714_16	-3.0002	318.411
cho714_17	-2.9813	318.048
cho714_18	-3.0455	322.596
cho714_19	-3.0953	321.258
cho714_1	-2.9911	328.291
cho714_20	-3.1095	319.883
cho714_2	-2.9862	328.744
cho714_3	-2.9797	322.275
cho714_4	-2.9709	321.754
cho714_5	-2.928	331.583
cho714_6	-3.0507	326.568
cho714_7	-3.0562	322.724
cho714_8	-2.9888	324.404
cho714_9	-3.0059	325.504
cho715_10	-3.849	355.628
cho715_11	-3.8276	349.812
cho715_12	-3.9075	352.934
cho715_13	-3.842	349.292
cho715_14	-3.8147	360.498
cho715_15	-3.805	355.529
cho715_16	-3.9103	353.329
cho715_17	-3.841	350.251
cho715_18	-3.8029	350.834
cho715_19	-3.828	355.018
cho715_1	-3.8096	360.525
cho715_20	-3.8259	356.195
cho715_2	-3.8104	360.314
cho715_3	-3.7928	355.17
cho715_4	-3.796	354.734
cho715_5	-3.7917	364.634
cho715_6	-3.8822	357.004
cho715_7	-3.8893	356.949
cho715_8	-3.7417	353.381
cho715_9	-3.8444	354.919
cho731_10	-1.7736	267.337
cho731_11	-1.7731	267.422
cho731_12	-1.8791	265.921
cho731_13	-1.8795	266.006
cho731_14	-1.7333	268.24
cho731_15	-1.7353	267.827
cho731_16	-1.7715	268.213
cho731_17	-1.7703	268.626
cho731_18	-1.8977	265.233
cho731_19	-1.7234	266.838
cho731_1	-2.0075	266.658
cho731_20	-1.7136	268.315
cho731_2	-1.9178	267.498
cho731_3	-1.9223	267.911
cho731_4	-1.8832	267.345
cho731_5	-1.8597	269.283
cho731_6	-1.8645	267.636
cho731_7	-1.8846	267.053
cho731_8	-1.935	267.973
cho731_9	-1.9347	268.328
cho751_10	-3.0674	323.552
cho751_11	-2.973	332.036
cho751_12	-3.0097	331.89
cho751_13	-2.973	332.228
cho751_14	-3.0109	332.056
cho751_15	-3.0292	325.761
cho751_16	-3.0221	330.837
cho751_17	-3.0188	330.522
cho751_18	-3.0336	325.698
cho751_19	-2.8361	326.675
cho751_1	-3.0807	329.866
cho751_20	-2.8412	326.174
cho751_2	-3.0346	329.446
cho751_3	-3.0369	325.103
cho751_4	-3.04	324.753
cho751_5	-3.0285	329.617
cho751_6	-3.0205	325.064
cho751_7	-3.0113	325.024
cho751_8	-3.0201	324.899
cho751_9	-3.0156	324.226
cho753_10	-3.6706	356.285
cho753_11	-3.7025	362.779
cho753_12	-3.7499	363.29
cho753_13	-3.7552	355.764
cho753_14	-3.8236	355.611
cho753_15	-3.7365	362.818
cho753_16	-3.6968	362.812
cho753_17	-3.7412	362.291
cho753_18	-3.7691	356.284
cho753_19	-3.7333	363.583
cho753_1	-3.8048	360.952
cho753_20	-3.6047	358.219
cho753_2	-3.7735	362.197
cho753_3	-3.7721	362.695
cho753_4	-3.7905	356.902
cho753_5	-3.7828	357.176
cho753_6	-3.6786	355.213
cho753_7	-3.7466	355.796
cho753_8	-3.8265	355.724
cho753_9	-3.7523	355.921
cho800_10	-3.8616	327.433
cho800_11	-3.9195	323.541
cho800_12	-3.7976	327.401
cho800_13	-3.8895	323.577
cho800_14	-3.6329	321.734
cho800_15	-3.5815	321.581
cho800_1	-4.5707	324.082
cho800_2	-4.4195	325.755
cho800_3	-4.3934	325.921
cho800_4	-4.4134	324.356
cho800_5	-4.4117	324.141
cho800_6	-4.1762	324.82
cho800_7	-4.2616	326.547
cho800_8	-4.2639	326.238
cho800_9	-4.1508	324.524
chobr010_1	-4.6274	288.797
chon101_1	-1.2171	195.469
chon103_10	-2.6294	251.395
chon103_11	-2.6508	251.833
chon103_12	-2.6438	251.665
chon103_13	-2.6374	252.21
chon103_14	-2.6341	251.632
chon103_15	-2.6292	249.87
chon103_16	-2.6665	249.605
chon103_17	-2.6669	249.154
chon103_18	-2.6326	250.063
chon103_19	-2.6416	255.453
chon103_1	-2.6331	256.946
chon103_20	-2.6499	256.551
chon103_2	-2.6353	257.206
chon103_3	-2.638	257.418
chon103_4	-2.643	257.435
chon103_5	-2.6507	250.518
chon103_6	-2.6374	257.442
chon103_7	-2.6296	251.933
chon103_8	-2.6517	250.434
chon103_9	-2.6447	257.435
nh00_1	0.5578	131.886

## Sheet: Cyclohexane
CompoundID_ConformationID	∆Gexpt-∆GPB,calc (kcal/mol)	SASA (Å2)
ch003_1	-2.0603	214.847
ch004_1	-2.824	246.306
ch004_2	-2.8271	242.405
ch004_3	-2.8271	241.345
ch005_1	-3.4533	275.815
ch005_2	-3.4574	272.512
ch005_3	-3.4578	270.932
ch005_4	-3.4578	271.83
ch005_5	-3.4575	272.525
ch005_6	-3.4626	267.615
ch005_7	-3.4634	265.325
ch005_8	-3.4587	260.329
ch005_9	-3.4587	261.119
ch008_10	-5.5654	367.777
ch008_11	-5.5631	367.22
ch008_12	-5.5694	360.15
ch008_13	-5.5699	361.272
ch008_14	-5.5688	361.501
ch008_15	-5.5742	360.271
ch008_16	-5.5691	360.222
ch008_17	-5.5735	362.067
ch008_18	-5.5702	361.717
ch008_19	-5.5648	362.839
ch008_1	-5.5594	372.328
ch008_20	-5.5659	363.768
ch008_2	-5.5639	368.131
ch008_3	-5.5646	367.839
ch008_4	-5.5641	367.965
ch008_5	-5.5641	366.905
ch008_6	-5.5638	367.036
ch008_7	-5.5639	368.521
ch008_8	-5.5653	367.17
ch008_9	-5.5647	367.476
ch076_1	-4.3849	267.617
ch200_1	-2.9993	244.176
ch201_1	-3.6859	276.589
ch202_1	-3.8257	301.76
ch202_2	-3.816	302.78
ch202_3	-3.8137	302.389
ch202_4	-3.799	300.616
ch202_5	-3.8073	300.401
ch202_6	-3.8039	299.714
ch222_1	-4.3179	304.122
ch223_1	-4.3319	307.256
ch300_1	-5.2676	320.127
chbr040_1	-3.9835	277.703
chcl052_1	-2.9078	251.039
chcl074_1	-2.8436	243.92
chcl101_1	-3.7897	271.745
chcl104_1	-4.5035	295.569
chf101_1	-2.382	253.127
chi100_1	-4.4152	282.914
chn002_1	-1.1374	229.745
chn011_1	0.317	205.911
chn031_1	-1.8709	273.108
chn031_2	-1.8955	268.124
chn031_3	-1.8981	267.562
chn031_4	-1.7458	266.9
chn031_5	-1.7454	265.598
chn031_6	-1.7814	260.186
chn031_7	-1.7662	258.837
chn110_1	-2.1863	265.667
chn111_1	-3.2834	285.983
chn112_1	-2.8677	298.147
chn114_1	-3.6828	293.674
chn114_2	-3.6357	293.096
chn114_3	-3.8244	295.027
chn130_1	-1.3752	223.525
chn140_1	-1.4743	239.254
chn141_1	-2.4633	267.947
chn142_1	-2.5108	265.736
chn143_1	-2.3992	266.424
chn147_1	-2.9872	304.171
chn190_1	-4.2027	308.514
chn200_1	1.2002	181.355
chn204_1	-2.4766	279.881
cho010_1	-1.7079	268.942
cho010_2	-1.5858	261.25
cho010_3	-1.5858	259.544
cho010_4	-1.5801	260.738
cho010_5	-1.5801	259.728
cho010_6	-1.4428	251.48
cho010_7	-1.4389	251.112
cho051_1	-2.9096	258.281
cho052_1	-1.4117	247.136
cho080_1	-3.2298	290.715
cho080_2	-3.2507	289.879
cho080_3	-3.1756	288.39
cho083_10	-3.9512	317.972
cho083_11	-3.9183	319.642
cho083_12	-3.9734	321.813
cho083_13	-3.937	326.21
cho083_14	-3.9825	325.646
cho083_15	-4.0086	313.939
cho083_16	-3.9157	321.903
cho083_17	-3.9883	319.523
cho083_18	-3.9452	313.209
cho083_19	-3.9181	314.552
cho083_1	-3.9483	324.797
cho083_20	-3.9109	319.624
cho083_2	-3.9049	324.496
cho083_3	-3.9653	324.862
cho083_4	-3.9688	325.549
cho083_5	-3.8975	324.191
cho083_6	-3.9163	325.748
cho083_7	-3.9189	325.07
cho083_8	-3.9279	318.824
cho083_9	-3.9244	318.851
cho101_1	1.3482	162.952
cho102_1	0.0547	198.553
cho103_1	-0.393	231.006
cho103_2	-0.4654	230.13
cho103_3	-0.468	230.108
cho104_1	-1.1565	262.824
cho104_2	-1.2504	260.202
cho104_3	-1.2376	259.929
cho104_4	-1.1755	259.314
cho104_5	-1.171	258.353
cho104_6	-1.2913	256.245
cho104_7	-1.2978	255.213
cho104_8	-1.5051	252.47
cho104_9	-1.5069	253.103
cho105_10	-1.3787	288.667
cho105_11	-1.3448	287.392
cho105_12	-1.3711	287.136
cho105_13	-1.3013	283.055
cho105_14	-1.279	284.03
cho105_15	-1.3576	288.411
cho105_16	-1.3755	280.617
cho105_17	-1.3501	281.775
cho105_18	-1.6082	283.161
cho105_19	-1.5963	283.255
cho105_1	-1.329	295.211
cho105_20	-1.739	277.461
cho105_2	-1.3166	292.644
cho105_3	-1.3081	292.388
cho105_4	-1.2705	288.94
cho105_5	-1.2677	289.187
cho105_6	-1.2731	289.959
cho105_7	-1.2705	291.234
cho105_8	-1.3693	287.098
cho105_9	-1.3523	286.604
cho106_10	-3.003	321.239
cho106_11	-3.0589	316.28
cho106_12	-3.0271	318.106
cho106_13	-3.0291	315.771
cho106_14	-3.005	319.69
cho106_15	-3.0203	317.355
cho106_16	-3.0146	317.831
cho106_17	-3.039	316.247
cho106_18	-3.0379	318.591
cho106_19	-3.0424	319.982
cho106_1	-2.9918	322.904
cho106_20	-2.9762	312.162
cho106_2	-3.038	321.839
cho106_3	-3.0411	320.255
cho106_4	-2.9693	320.754
cho106_5	-2.9694	318.419
cho106_6	-2.9831	318.509
cho106_7	-2.9905	319.407
cho106_8	-3.002	318.895
cho106_9	-3.0762	316.384
cho107_10	-3.6913	351.848
cho107_11	-3.7007	352.724
cho107_12	-3.78	348.498
cho107_13	-3.7527	351.328
cho107_14	-3.7589	350.017
cho107_15	-3.7474	351.723
cho107_16	-3.7214	349.623
cho107_17	-3.7437	348.26
cho107_18	-3.7301	350.332
cho107_19	-3.7475	351.88
cho107_1	-3.6679	356.472
cho107_20	-3.7211	349.124
cho107_2	-3.7287	354.865
cho107_3	-3.7439	355.26
cho107_4	-3.6868	350.682
cho107_5	-3.6894	351.229
cho107_6	-3.6759	352.935
cho107_7	-3.6718	351.417
cho107_8	-3.6632	351.939
cho107_9	-3.6764	353.092
cho140_1	-0.1488	225.956
cho160_1	-0.6848	249.773
cho350_1	-2.2293	259.594
cho352_1	-2.9449	284.928
cho353_1	-2.0075	288.187
cho354_1	-2.5425	290.786
cho503_1	-0.2172	219.568
cho505_10	-1.8913	273.072
cho505_11	-1.8971	274.153
cho505_12	-1.9337	274.283
cho505_13	-1.8454	279.714
cho505_14	-1.9365	274.615
cho505_15	-1.9044	274.498
cho505_16	-1.8386	278.198
cho505_17	-1.8428	278.005
cho505_18	-1.9084	281.431
cho505_19	-1.9089	281.494
cho505_1	-1.9643	279.812
cho505_20	-1.9613	274.61
cho505_2	-1.9692	273.314
cho505_3	-1.9264	281.408
cho505_4	-1.9371	275.713
cho505_5	-1.969	273.902
cho505_6	-1.9264	281.08
cho505_7	-1.9431	276.593
cho505_8	-1.8489	280.028
cho505_9	-1.8883	272.866
cho506_10	-2.4894	304.108
cho506_11	-2.4477	310.926
cho506_12	-2.5237	307.082
cho506_13	-2.527	304.799
cho506_14	-2.5264	304.534
cho506_15	-2.5015	305.225
cho506_16	-2.5011	304.817
cho506_17	-2.5131	306.144
cho506_18	-2.4382	309.944
cho506_19	-2.4284	309.643
cho506_1	-2.5105	311.54
cho506_20	-2.4866	312.616
cho506_2	-2.4922	312.983
cho506_3	-2.4972	313.024
cho506_4	-2.5488	307.566
cho506_5	-2.5414	306.88
cho506_6	-2.5456	307.613
cho506_7	-2.5457	306.25
cho506_8	-2.4456	310.437
cho506_9	-2.4865	302.825
cho507_10	-3.1442	342.595
cho507_11	-3.1403	342.564
cho507_12	-3.221	338.191
cho507_13	-3.1806	337.774
cho507_14	-3.2271	338.605
cho507_15	-3.2245	337.681
cho507_16	-3.1848	337.416
cho507_17	-3.1867	338.215
cho507_18	-3.1159	340.302
cho507_19	-3.1123	341.21
cho507_1	-3.211	342.667
cho507_20	-3.1842	345.61
cho507_2	-3.2419	339.101
cho507_3	-3.2139	344.207
cho507_4	-3.2108	344.899
cho507_5	-3.2472	339.73
cho507_6	-3.2549	338.192
cho507_7	-3.2384	337.156
cho507_8	-3.1721	336.101
cho507_9	-3.1712	334.977
cho520_10	-2.1247	281.206
cho520_11	-2.1247	281.619
cho520_12	-2.1281	277.868
cho520_13	-2.1277	277.343
cho520_14	-2.1271	277.339
cho520_15	-2.1448	282.22
cho520_16	-2.1453	281.937
cho520_17	-2.1422	280.451
cho520_18	-2.1424	280.64
cho520_19	-2.1425	280.469
cho520_1	-2.2025	279.317
cho520_20	-2.1424	280.621
cho520_2	-2.141	281.334
cho520_3	-2.1438	280.068
cho520_4	-2.1409	280.046
cho520_5	-2.1439	281.114
cho520_6	-2.1313	278.518
cho520_7	-2.1312	277.607
cho520_8	-2.134	278.653
cho520_9	-2.1336	277.486
cho531_1	-2.261	288.91
cho531_2	-2.2766	288.665
cho531_3	-2.2836	288.009
cho531_4	-2.2444	288.821
cho570_1	-3.2063	302.266
cho570_2	-3.1155	304.386
cho570_3	-3.0344	304.079
cho640_1	-2.5886	277.474
cho640_2	-2.4455	278.274
cho640_3	-2.4427	277.646
cho651_1	-1.9735	289.802
cho651_2	-1.8501	289.651
cho651_3	-1.8525	289.651
cho651_4	-1.5006	287.5
cho651_5	-1.4044	289.728
cho651_6	-1.4036	289.521
cho652_1	-1.9232	289.906
cho652_2	-1.8288	290.344
cho652_3	-1.6376	291.178
cho670_1	2.9621	200.673
cho671_10	-0.116	231.645
cho671_11	-0.0954	232.453
cho671_12	-0.1049	231.738
cho671_1	-0.1086	232.642
cho671_2	-0.1209	233.402
cho671_3	-0.123	233.6
cho671_4	-0.152	234.096
cho671_5	-0.1482	234.648
cho671_6	-0.0667	234.286
cho671_7	-0.1275	234.029
cho671_8	-0.0719	233.873
cho671_9	-0.1203	233.361
cho711_1	-0.6497	236.395
cho711_2	-0.493	237.573
cho711_3	-0.4948	237.581
cho711_4	-0.0506	236.506
cho711_5	-0.0702	236.919
cho712_10	-1.0433	263.901
cho712_11	-1.0864	268.26
cho712_12	-1.0949	261.107
cho712_13	-1.1083	260.802
cho712_14	-1.2306	261.07
cho712_15	-1.2281	261.447
cho712_16	-0.7487	269.423
cho712_17	-0.8452	263.514
cho712_18	-0.6449	258.567
cho712_19	-0.6043	260.483
cho712_1	-1.2311	265.45
cho712_20	-0.6063	258.45
cho712_2	-1.2273	265.329
cho712_3	-1.3286	262.26
cho712_4	-1.326	262.075
cho712_5	-1.2056	270.353
cho712_6	-1.1744	264.243
cho712_7	-1.1727	264.278
cho712_8	-1.0467	263.718
cho712_9	-1.1172	269.564
cho713_10	-2.1181	297.518
cho713_11	-2.1898	286.149
cho713_12	-2.0708	296.914
cho713_13	-2.0474	292.634
cho713_14	-2.2536	282.116
cho713_15	-2.0511	292.634
cho713_16	-2.0736	296.977
cho713_17	-2.259	282.098
cho713_18	-2.0534	292.921
cho713_19	-1.9967	302.603
cho713_1	-2.1519	296.899
cho713_20	-1.994	298.496
cho713_2	-2.1529	296.733
cho713_3	-2.1615	290.238
cho713_4	-2.1606	289.91
cho713_5	-2.205	294.428
cho713_6	-2.0963	303.108
cho713_7	-2.2033	293.745
cho713_8	-2.1838	286.284
cho713_9	-2.1241	291.658
cho714_10	-2.808	325.37
cho714_11	-2.8288	322.626
cho714_12	-2.7801	317.985
cho714_13	-2.7767	318.08
cho714_14	-2.6834	322.26
cho714_15	-2.7458	328.056
cho714_16	-2.7633	318.411
cho714_17	-2.7469	318.048
cho714_18	-2.7992	322.596
cho714_19	-2.8428	321.258
cho714_1	-2.7522	328.291
cho714_20	-2.8553	319.883
cho714_2	-2.7479	328.744
cho714_3	-2.7453	322.275
cho714_4	-2.7373	321.754
cho714_5	-2.6946	331.583
cho714_6	-2.8026	326.568
cho714_7	-2.8092	322.724
cho714_8	-2.7488	324.404
cho714_9	-2.7637	325.504
cho715_10	-3.5364	355.628
cho715_11	-3.5251	349.812
cho715_12	-3.5884	352.934
cho715_13	-3.5341	349.292
cho715_14	-3.5083	360.498
cho715_15	-3.5006	355.529
cho715_16	-3.5912	353.329
cho715_17	-3.5327	350.251
cho715_18	-3.5003	350.834
cho715_19	-3.5204	355.018
cho715_1	-3.5033	360.525
cho715_20	-3.5184	356.195
cho715_2	-3.5037	360.314
cho715_3	-3.4931	355.17
cho715_4	-3.4953	354.734
cho715_5	-3.4849	364.634
cho715_6	-3.566	357.004
cho715_7	-3.5719	356.949
cho715_8	-3.4503	353.381
cho715_9	-3.5313	354.919
cho731_10	-1.2957	267.337
cho731_11	-1.2952	267.422
cho731_12	-1.3817	265.921
cho731_13	-1.3821	266.006
cho731_14	-1.2597	268.24
cho731_15	-1.2616	267.827
cho731_16	-1.2951	268.213
cho731_17	-1.2942	268.626
cho731_18	-1.4017	265.233
cho731_19	-1.2506	266.838
cho731_1	-1.4998	266.658
cho731_20	-1.2418	268.315
cho731_2	-1.4179	267.498
cho731_3	-1.422	267.911
cho731_4	-1.3873	267.345
cho731_5	-1.3668	269.283
cho731_6	-1.3709	267.636
cho731_7	-1.3885	267.053
cho731_8	-1.432	267.973
cho731_9	-1.4318	268.328
cho751_10	-2.8575	323.552
cho751_11	-2.767	332.036
cho751_12	-2.7968	331.89
cho751_13	-2.7669	332.228
cho751_14	-2.7977	332.056
cho751_15	-2.8202	325.761
cho751_16	-2.8071	330.837
cho751_17	-2.804	330.522
cho751_18	-2.8241	325.698
cho751_19	-2.656	326.675
cho751_1	-2.8648	329.866
cho751_20	-2.8164	325.256
cho751_2	-2.821	329.446
cho751_3	-2.8246	325.103
cho751_4	-2.8276	324.753
cho751_5	-2.8156	329.617
cho751_6	-2.8094	325.064
cho751_7	-2.8022	325.024
cho751_8	-2.8093	324.899
cho751_9	-2.8058	324.226
cho753_10	-3.4517	356.285
cho753_11	-3.4779	362.779
cho753_12	-3.5163	363.29
cho753_13	-3.5276	355.764
cho753_14	-3.5903	355.611
cho753_15	-3.5051	362.818
cho753_16	-3.4727	362.812
cho753_17	-3.5085	362.291
cho753_18	-3.5399	356.284
cho753_19	-3.5012	363.583
cho753_1	-3.5699	360.952
cho753_20	-3.4009	358.219
cho753_2	-3.5387	362.197
cho753_3	-3.5383	362.695
cho753_4	-3.5589	356.902
cho753_5	-3.5515	357.176
cho753_6	-3.4597	355.213
cho753_7	-3.5208	355.796
cho753_8	-3.5925	355.724
cho753_9	-3.5244	355.921
cho800_10	-3.5374	327.433
cho800_11	-3.5861	323.541
cho800_12	-3.481	327.401
cho800_13	-3.5608	323.577
cho800_14	-3.3526	321.734
cho800_15	-3.3094	321.581
cho800_1	-4.1488	324.082
cho800_2	-4.0196	325.755
cho800_3	-3.9961	325.921
cho800_4	-4.0148	324.356
cho800_5	-4.0135	324.141
cho800_6	-3.8128	324.82
cho800_7	-3.8855	326.547
cho800_8	-3.8855	326.238
cho800_9	-3.7896	324.524
chobr010_1	-3.7286	288.797
chof001_1	1.5323	221.814
chon101_1	-0.2288	195.469
chon103_10	-1.8345	251.395
chon103_11	-1.85	251.833
chon103_12	-1.8438	251.665
chon103_13	-1.8394	252.21
chon103_14	-1.8365	251.632
chon103_15	-1.8339	249.87
chon103_16	-1.8657	249.605
chon103_17	-1.8671	249.154
chon103_18	-1.8368	250.063
chon103_19	-1.8441	255.453
chon103_1	-1.8339	256.946
chon103_20	-1.8493	256.551
chon103_2	-1.8354	257.206
chon103_3	-1.8379	257.418
chon103_4	-1.8416	257.435
chon103_5	-1.8507	250.518
chon103_6	-1.837	257.442
chon103_7	-1.8341	251.933
chon103_8	-1.8521	250.434
chon103_9	-1.8429	257.435
chon120_1	-4.181	283.244
chon120_2	-3.7463	288.808
chon121_1	-3.9723	310.452
chon121_2	-3.9877	310.325
chon121_3	-4.4187	303.625
chon721_1	0.0124	238.302
chon721_2	-0.0198	237.61
chon800_1	-3.179	295.836
chon800_2	-3.1695	295.724
chon800_3	-3.1287	294.469
chs040_1	-3.6991	304.623
chs040_2	-3.6912	303.44
chs040_3	-3.7573	305.519
chs040_4	-3.5886	301.269
chs040_5	-3.5882	300.793
chs040_6	-3.5449	298.064
chs052_1	-1.7293	248.813
chs052_2	-1.7057	245.448
chs052_3	-1.7053	245.181

## Sheet: SMILES_Toluene
Compound ID	SIMLE Strings
ch008	CCCCCCCC
ch201	Cc1ccccc1
chn002	CN(C)C
chn010	CN
chn011	CCN
chn012	CCCN
chn013	CCCCN
chn030	CNC
chn031	CCNCC
chn032	CCCNCCC
chn110	Nc1ccccc1
chn112	Cc1ccc(cc1)N
chn140	c1cccnc1
cho052	O1CCOCC1
cho101	CO
cho102	CCO
cho103	CCCO
cho104	CCCCO
cho105	CCCCCO
cho106	CCCCCCO
cho107	CCCCCCCO
cho350	Oc1ccccc1
cho352	Cc1ccccc1O
cho354	Cc1ccc(cc1)O
cho503	CC(=O)C
cho505	CCCC(=O)C
cho506	CCCCC(=O)C
cho507	CCCCCC(=O)C
cho531	CC(=O)C(C)(C)C
cho670	CC(=O)O
cho671	CCC(=O)O
cho672	CCCC(=O)O
cho673	CCCCC(=O)O
cho674	CCCCCC(=O)O
cho711	COC(=O)C
cho712	CCOC(=O)C
cho713	CCCOC(=O)C
cho714	CCCCOC(=O)C
cho715	CCCCCOC(=O)C
cho731	CCC(=O)OC
cho751	CCCCC(=O)OC
cho753	CCCCCC(=O)OC
cho800	COC(=O)c1ccccc1
chobr010	Oc1ccc(cc1)Br
chon101	[O-][N](=O)C
chon103	[O-][N](=O)CCC
nh00	N

## Sheet: SMILES_cyclohexane
Compound ID	SIMLE Strings
ch003	CCC
ch004	CCCC
ch005	CCCCC
ch008	CCCCCCCC
ch076	C1CCCCC1
ch200	c1ccccc1
ch201	Cc1ccccc1
ch202	CCc1ccccc1
ch222	Cc1ccccc1C
ch223	Cc1cccc(c1)C
ch300	c1ccc2c(c1)cccc2
chbr040	Brc1ccccc1
chcl052	CC(Cl)(Cl)Cl
chcl074	ClC=C(Cl)Cl
chcl101	Clc1ccccc1
chcl104	Clc1ccc(cc1)Cl
chf101	Fc1ccccc1
chi100	Ic1ccccc1
chn002	CN(C)C
chn011	CCN
chn031	CCNCC
chn110	Nc1ccccc1
chn111	Cc1ccccc1N
chn112	Cc1ccc(cc1)N
chn114	CNc1ccccc1
chn130	N1C=CC=C1
chn140	c1cccnc1
chn141	Cc1ccccn1
chn142	Cc1cccnc1
chn143	Cc1ccncc1
chn147	Cc1cccc(n1)C
chn190	c1ccc2c(c1)nccc2
chn200	CC#N
chn204	N#Cc1ccccc1
cho010	CCOCC
cho051	C1CCCOC1
cho052	O1CCOCC1
cho080	COc1ccccc1
cho083	CCOc1ccccc1
cho101	CO
cho102	CCO
cho103	CCCO
cho104	CCCCO
cho105	CCCCCO
cho106	CCCCCCO
cho107	CCCCCCCO
cho140	CC(O)C
cho160	CC(O)(C)C
cho350	Oc1ccccc1
cho352	Cc1ccccc1O
cho353	Cc1cccc(c1)O
cho354	Cc1ccc(cc1)O
cho503	CC(=O)C
cho505	CCCC(=O)C
cho506	CCCCC(=O)C
cho507	CCCCCC(=O)C
cho520	CCC(=O)CC
cho531	CC(=O)C(C)(C)C
cho570	CC(=O)c1ccccc1
cho640	O=Cc1ccccc1
cho651	O=Cc1cccc(c1)O
cho652	O=Cc1ccc(cc1)O
cho670	CC(=O)O
cho671	CCC(=O)O
cho711	COC(=O)C
cho712	CCOC(=O)C
cho713	CCCOC(=O)C
cho714	CCCCOC(=O)C
cho715	CCCCCOC(=O)C
cho731	CCC(=O)OC
cho751	CCCCC(=O)OC
cho753	CCCCCC(=O)OC
cho800	COC(=O)c1ccccc1
chobr010	Oc1ccc(cc1)Br
chof001	OCC(F)(F)F
chon101	[O-][N](=O)C
chon103	[O-][N](=O)CCC
chon120	[O-][N](=O)c1ccccc1
chon121	[O-][N](=O)c1ccccc1C
chon721	O=CN(C)C
chon800	NC(=O)c1ccccc1
chs040	CSc1ccccc1
chs052	CCCS
