# Supplementary material for: Development and test of highly accurate endpoint free energy methods. 3: partition coefficient prediction using a Poisson–Boltzmann method combined with a solvent accessible surface area model for SAMPL challenges
Source: Royal Society of Chemistry journal article supplement (doi:10.1039/d3cp04174c), 2023-11-21
Supplement: d3cp04174c2.xlsx [file d3cp04174c2.xlsx]

## Sheet: SAMPL9_TI
Table S2 The experimental logP in SAMPL9 dataset and the TI calculated logP. Standard deviation was calculated from three independent TI runs.
Solute ID	logPexpt	logPcalc	Standard Deviation
1	-5.11	-2.56	0.15
2	-3.26	-5.14	0.36
3	-7.49	-8.25	0.17
4	-7.44	-8.34	0.28
5	-4.91	-6.57	0.16
6	1.67	3.72	0.17
7	-5.94	-7.98	0.23
8	-3.79	-6.92	1.08
9	-6.87	-8.46	0.14
10	-3.36	-3.57	0.19
11	-1.99	-2.63	0.31
12	2.16	4.55	0.25
13	-0.49	-0.44	0.24
14	-1.92	-5.49	0.41
15	1.01	2.76	0.11
16	-5.13	-8.96	0.21
R		0.921753
MSE		-0.71
MUE		1.81
RMSE		2.11
