# Supplementary material for: Development and test of highly accurate endpoint free energy methods. 3: partition coefficient prediction using a Poisson–Boltzmann method combined with a solvent accessible surface area model for SAMPL challenges
Source: Royal Society of Chemistry journal article supplement (doi:10.1039/d3cp04174c), 2023-11-21
Supplement: d3cp04174c3.xlsx [file d3cp04174c3.xlsx]

## Sheet: SAMPL5_TI
Table S3 The experimental logD from SAMPL5 dataset and the calculated cyclohexane-water logP and logD using TI. Standard Deviation was calculated from three independent TI runs.
Solute ID	logDexpt	logPcalc	logDcalc	Standard Deviation
SAMPL5_002	1.4	0.744	0.744	0.214
SAMPL5_003	1.9	1.843	1.843	0.094
SAMPL5_004	2.2	2.604	2.497	0.151
SAMPL5_005	-0.86	0.748	0.748	0.164
SAMPL5_006	-1.02	-0.018	-0.018	0.141
SAMPL5_007	1.4	3.754	3.603	0.137
SAMPL5_010	-1.7	-2.822	-5.362	0.089
SAMPL5_011	-2.96	-0.723	-4.112	0.225
SAMPL5_013	-1.5	-0.831	-0.831	0.197
SAMPL5_015	-2.2	-3.27	-6.319	0.167
SAMPL5_017	2.5	4.956	4.956	0.221
SAMPL5_019	1.2	1.558	1.502	0.137
SAMPL5_020	1.6	1.891	1.891	0.214
SAMPL5_021	1.2	3.248	3.248	0.178
SAMPL5_024	1	3.833	3.833	0.187
SAMPL5_026	-2.6	-0.904	-3.574	0.137
SAMPL5_027	-1.87	-2.837	-2.837	0.137
SAMPL5_033	1.8	3.416	3.416	0.334
SAMPL5_037	-1.5	-3.539	-4.376	0.187
SAMPL5_042	-1.1	-0.988	-0.988	0.122
SAMPL5_044	1	0.254	0.254	0.437
SAMPL5_045	-2.1	-2.806	-2.806	0.1
SAMPL5_046	0.2	0.669	0.669	0.316
SAMPL5_047	-0.4	1.148	1.148	0.194
SAMPL5_048	0.9	0.568	0.568	0.181
SAMPL5_049	1.3	-0.906	-0.906	0.2
SAMPL5_050	-3.2	-1.317	-1.704	0.173
SAMPL5_055	-1.5	-2.789	-2.789	0.184
SAMPL5_056	-2.5	-4.385	-4.465	0.137
SAMPL5_058	0.8	1.697	1.697	0.118
SAMPL5_059	-1.3	-1.32	-1.32	0.181
SAMPL5_060	-3.9	-2.164	-4.614	0.279
SAMPL5_061	-1.45	-1.491	-1.644	0.407
SAMPL5_063	-3	-5.878	-7.537	0.151
SAMPL5_065	0.7	0.886	-0.182	0.4
SAMPL5_067	-1.3	2.216	0.752	0.216
SAMPL5_068	1.4	3.408	3.408	0.184
SAMPL5_069	-1.3	0.362	0.35	0.464
SAMPL5_070	1.6	5.251	3.327	0.32
SAMPL5_071	-0.1	-0.012	-0.012	0.236
SAMPL5_072	0.6	3.589	2.344	0.207
SAMPL5_074	-1.9	-9.529	-9.529	0.077
SAMPL5_075	-2.8	1.53	0.398	0.167
SAMPL5_080	-2.2	-4.554	-4.554	0.054
SAMPL5_081	-2.2	-4.684	-5.617	0.17
SAMPL5_082	2.5	7.66	6.873	0.2
SAMPL5_083	-1.9	-0.292	-0.292	1.58
SAMPL5_084	0	2.106	1.26	0.289
SAMPL5_085	-2.2	-2.421	-2.421	0.204
SAMPL5_086	0.7	0.703	-1.419	0.58
SAMPL5_088	-1.9	-3.749	-3.749	0.158
SAMPL5_090	0.8	1.518	1.518	0.141
SAMPL5_092	-0.4	-0.21	-0.21	0.207
R			0.809044
MSE			-0.097
MUE			1.624
RMSE			2.153
