# Supplementary material for: Development and test of highly accurate endpoint free energy methods. 3: partition coefficient prediction using a Poisson–Boltzmann method combined with a solvent accessible surface area model for SAMPL challenges
Source: Royal Society of Chemistry journal article supplement (doi:10.1039/d3cp04174c), 2023-11-21
Supplement: d3cp04174c4.xlsx [file d3cp04174c4.xlsx]

## Sheet: Toluene
Table S4 Additional test set data. PBSA calculated logP and QM+SMD calculated logP.
logPexpt	logPPBSA	logPSMD	SMILES String
1.35	-2.729	-3.739	CCC(=O)NC(=O)Nc1ccccc1
-2.42	-1.633	-9.498	NC(=O)C(c1ccccc1)C(=O)N
2.232	2.208	1.783	CCCC(=O)CC
-1.63	1.04	-5.663	O=C([C@H](c1ccccc1)C(=O)O)N[C@H]1[C@H]2CC([C@@H](N2C1=O)C(=O)O)(C)C
1.272	-0.329	-1.672	OC(=O)c1ccccc1
1.1	0.28	-0.915	OC(=O)c1ccccc1C
-0.31	-2.999	-5.09	CNC(=O)Nc1ccccn1
1.64	-5.213	-2.128	O=C(Nc1ccccn1)Nc1ccccc1
-1.75	-0.711	-2.298	CC(=O)Nc1ccccc1N
0.01	-0.696	-2.796	NCCNC(=O)c1ccccc1
1.43	2.055	2.413	Cc1cc(C)nc(c1)C
2.75	-1.015	-0.953	Cc1ccc2c(n1)c(O)ccc2
0.595	0.184	0.238	Oc1cccc(c1)F
1.8	2.19	2.281	CCc1ccc(nc1)C
2.1	2.019	2.222	COC(=O)c1ccccc1NC
1.9	0.205	1.196	COc1ccccc1C(=O)NC1=Nc2c(N1)cccc2
2.21	-1.565	-1.542	Oc1cccc2c1nccc2
1.6	2.301	1.825	CC(NC(=O)c1ccc2c(c1)cccc2)C
-0.27	1.075	0.047	CC[C@@H](C(=O)O)Br
-0.8	0.331	-0.552	C[C@@H](C(=O)O)Br
0.38	1.803	0.614	CCC[C@@H](C(=O)O)Br
0.2	1.276	-1.009	C1CC[C@H](NC1)c1cccnc1
0.34	1.727	1.041	OC(=O)C(c1ccccc1)(c1ccccc1)O
-0.97	0.071	-0.699	OC(=O)CCBr
-1.23	-0.081	-1.059	OC(=O)CCCl
1.96	1.915	2.904	CNc1ccccc1CC
-1.55	-0.77	-1.289	OC(=O)CBr
0.3	5.254	5.559	Brc1c(O)c(cc(c1C)C1(OS(=O)(=O)c2c1cccc2)c1cc(C(C)C)c(c(c1C)Br)O)C(C)C
4.004	3.862	4.064	CCCCOC(=O)c1ccccc1
-2.46	-2.071	-3.725	OCCNC1=Nc2c(N1)cccc2
4.393	3.307	4.152	CCCCC=C
3.576	2.389	3.828	C1CCC=CC1
3.185	1.485	3.041	c1ccccc1
5.246	2.476	5.267	c1ccc2-c3c(Cc2c1)cccc3
3.039	1.929	3.594	Brc1ccccc1
2.77	0.898	2.041	ClC(Cl)Cl
2.51	0.3	0.871	ClCCCl
3.277	2.106	3.372	Clc1ccccc1
3.942	2.512	3.677	Clc1ccccc1Cl
2.522	0.643	-0.58	CI
3.862	2.188	1.453	Ic1ccccc1
-1.76	-0.719	-2.104	OC(C(Cl)(Cl)Cl)O
3.502	2.749	3.461	ClC1CCCCC1
1.295	2.842	2.134	CCN(CC)CC
1.841	1.985	1.468	CCCCCCN
2.366	-0.06	1.789	Nc1cccc2c1cccc2
-0.06	-0.935	-0.213	CC#N
0.638	-0.03	0.436	CCC#N
1.415	1.815	1.635	CCOCC
1.272	2.058	1.642	COC(C)(C)C
2.945	1.402	2.416	COc1ccccc1
-0.822	0.112	-0.7	CC(O)C
-0.712	0.513	-0.248	CC(O)(C)C
-0.124	0.768	0.292	OC1CCCC1
-3.932	-4.1	-5.3	OCCO
0.591	0.376	0.777	Cc1cccc(c1)O
0.829	1.501	1.17	CCC(=O)CC
2.377	1.004	2.032	CC(=O)c1ccccc1
2.006	0.382	1.838	O=Cc1ccccc1
2.15	0.209	1.503	O=Cc1ccccc1O
-0.046	-1.11	-0.916	O=Cc1cccc(c1)O
-0.35	1.457	0.023	CC(CC(=O)O)C
-0.49	0.823	-0.502	CC(=O)Oc1ccccc1C(=O)O
0.45	0.692	-0.82	COc1ccccc1C(=O)O
0.54	0.815	-0.082	COc1ccc(cc1)C(=O)O
0.134	-0.473	-0.342	COC=O
0.215	-0.014	0.154	Oc1ccc(cc1)F
0.413	-0.433	-0.141	CN([O])[O]
1.121	0.363	0.316	CCN([O])[O]
1.4	1.237	1.165	CCCN([O])[O]
3.001	1.341	2.641	[O]N(c1ccccc1)[O]
1.64	0.207	0.26	[O]N(c1ccccc1N)[O]
1.19	-0.232	0.164	Nc1cccc(c1)N([O])[O]
2.28	-0.652	-0.032	[O]N(c1ccccc1O)[O]
-0.207	-0.456	-0.701	Oc1ccc(cc1)N([O])[O]
-1.597	-0.06	-1.266	CC(=O)N(C)C
1.6	0.931	0.777	OC(=O)/C=C/c1ccccc1
-1.05	0.218	-0.7	C/C=C/C(=O)O
1.86	4.149	-9.45	CC[C@H]1OC(=O)[C@H](C)[C@@H](O[C@@H]2O[C@@H](C)[C@@H]([C@](C2)(C)OC)O)[C@H](C)[C@@H](O[C@@H]2O[C@H](C)C[C@@H]([C@H]2O)N(C)C)[C@H](C[C@H](C(=O)[C@@H]([C@H]([C@]1(C)O)O)C)C)C
0.13	0.441	-0.072	CC(NC(=O)Nc1ccccc1)C
-0.29	1.535	-1.449	OP(=O)(OCc1ccccc1)OCc1ccccc1
-0.7	2.856	-1.542	CCCCOP(=O)(OCCCC)O
-1.42	-0.022	-1.086	ClC(C(=O)O)Cl
1.886	1.672	0.932	CCOC(=O)OCC
1.59	0.213	-0.619	O=C(/N=N/c1ccccc1)NNc1ccccc1
0.61	0.493	-0.154	NC(=O)C(c1ccccc1)c1ccccc1
1.2	-0.052	0.931	O=C1NC(=O)[C@@H](C(=O)N1Cc1ccccc1)c1ccccc1
-1.01	-1.031	-1.436	CNC(=O)Nc1ccccc1
0.91	1.018	1.053	CC(Nc1ccccc1N)C
1.06	1.176	-0.377	NCCN[C@@H](c1ccccc1)C
1.12	1.335	1.002	Clc1cccc(c1)C(=O)O
0.09	0.842	0.345	[O]N(c1cccc(c1)C(=O)O)[O]
0.86	1.862	0.737	CN1CCC[C@H]1c1cccnc1
0.61	0.959	0.605	CNc1ccccc1C(=O)O
0.27	0.939	0.435	OC(=O)c1ccccc1Cl
-0.32	0.562	-0.019	OC(=O)c1ccccc1N([O])[O]
1.26	1.273	1.025	OC(=O)c1ccc(cc1)Cl
0.78	-0.517	-1.633	[O]N(c1ccc(cc1)N)[O]
0.51	0.763	0.613	[O]N(c1ccc(cc1)C(=O)O)[O]
0.025	-0.976	-2	C[C@H]1COC(=O)O1
0.68	1.503	0.963	OC(=O)c1ccc(cc1)C
-1.946	-2.035	-2.495	Oc1cccc(c1)O
0.31	-1.701	-3.551	OC(=O)c1ccccc1O
1.77	-3.902	-10.81	CCc1cc(N)c(cc1O)/C=N/NC(=O)N/N=C/c1cc(O)c(cc1N)CC
2.129	2.208	1.683	CC(=O)OC(C)(C)C
1.796	2.788	2.388	CCOC(C)(C)C
0.58	7.207	1.244	CCCCP(=O)(CCCC)CCCC
-0.98	1.153	0.271	OC(=O)C(Cl)(Cl)Cl
2.52	5.129	3.971	CCCN(CCC)CCC
0.64	-1.545	-2.319	COc1cc(C=O)ccc1O

## Sheet: Cyclohexane
logPexpt	logPPBSA	logPSMD	SMILES String
1.91	0.175	2.023	O=C1C=C(Cl)C(=O)c2c1cccc2
2.32	1.405	1.192	COc1cccc(c1)OC
-0.12	-0.201	0.313	O=C1CC(=O)c2c1cccc2
1.82	-0.203	1.287	N#CC(=Cc1ccc(cc1)Cl)C#N
2.1	0.273	1.749	N#CC(=Cc1ccccc1Cl)C#N
2.26	0.065	1.985	N#CC(=Cc1ccccc1Br)C#N
2.71	0.696	2.124	N#CC(=Cc1ccc(cc1Cl)Cl)C#N
0.96	1.147	1.426	O=C1CCc2c1cccc2
0.53	0.936	0.37	CCCN([O])[O]
2.03	-0.165	1.487	N#CC(=Cc1ccc(cc1)Br)C#N
1.01	0.495	0.381	[O]N(/C=C/C1=CC=CO1)[O]
1.46	0.383	0.611	[O]N(/C=C/C1=CC=CS1)[O]
-0.15	0.447	0.655	Oc1ccc(c(c1F)F)F
0.97	0.853	1.325	Cc1cc(C)c(c(c1)O)C
2.84	1.876	3.347	O=C1C(=C(Br)C(=O)c2c1cccc2)Br
0.51	0.228	0.765	Cc1c(C)cccc1O
0.94	0.987	1.205	Cc1cc(O)c(cc1C)C
1.24	1.015	1.405	Cc1cc(C)c(c(c1)C)O
1.23	0.317	1.177	Cc1ccc(c(c1)C)N
1.22	0.38	1.149	Cc1ccc(c(c1)N)C
1.35	0.133	1.137	Cc1cccc(c1N)C
-2.37	-2.781	-2.491	Nc1ccccc1O
0.26	0.106	2.22	Oc1ccccc1Br
1.25	-0.177	0.686	Nc1ccccc1Cl
-0.34	0.463	-0.299	OC(=O)c1ccccc1Cl
0.08	0.774	1.552	Oc1ccccc1Cl
1.06	1.358	1.301	CCc1ccc(cc1O)C
1.08	0.981	1.219	CC(c1ccccc1O)C
-0.88	-0.019	-0.897	OC(=O)c1ccccc1N([O])[O]
1.49	-1.55	-2.39	[O]N(c1ccccc1O)[O]
1.18	1.201	1.421	CCCc1ccccc1O
0.63	0.517	0.962	Oc1cc(C)c(c(c1)C)C
2.28	-0.18	1.448	N#CC(=Cc1ccc(c(c1)Cl)Cl)C#N
0.2	0.224	0.586	Oc1ccc(c(c1)C)C
1.18	0.491	1.106	Cc1cc(C)cc(c1)N
1.97	-0.098	1.33	N#CC(=Cc1cccc(c1)Br)C#N
-3.24	-2.923	-2.718	Nc1cccc(c1)O
1.28	-1.387	-1.294	Nc1cnc2c(c1)cccc2
-0.52	-0.305	0.232	Oc1cccc(c1)Br
0.89	-0.212	0.276	Nc1cccc(c1)Cl
-0.7	0.006	0.046	Oc1cccc(c1)Cl
0.97	0.895	1.2	CCc1cccc(c1C)O
0.74	0.777	1.055	CCc1cc(O)ccc1C
0.73	1.093	1.269	CCc1cc(C)cc(c1)O
-0.1	-0.1	-3.338	Oc1cccc(c1)I
-0.42	-0.821	-0.549	Nc1cccc(c1)N([O])[O]
-1.52	-0.851	-0.892	Oc1cccc(c1)N([O])[O]
0.83	1.314	1.321	CCCc1cccc(c1)O
-3.44	-3.128	-3.063	Nc1ccc(cc1)O
0.15	0.36	0.447	Oc1ccc(c(c1)C)Cl
0.69	0.27	0.37	Nc1ccc(cc1)Cl
1.01	1.152	1.345	CCc1ccc(c(c1)C)O
-1	-0.51	-0.379	Oc1ccc(cc1)F
-2.14	-1.622	-1.841	CC(=O)c1ccc(cc1)O
0.61	0.581	1.083	Oc1cccc2c1CCC2
-1.08	-0.971	-1.135	COc1ccc(cc1)O
-1	-1.168	-2.45	[O]N(c1ccc(cc1)N)[O]
0.86	0.998	1.314	CCCc1ccc(cc1)O
1.02	1.29	1.381	CCc1ccc(c(c1)O)C
0.48	0.554	1.094	Oc1ccc2c(c1)CCC2
2.12	0.811	2.504	O=C1C=C(Br)C(=O)c2c1cccc2
2.45	0.313	1.767	N#CC(=Cc1c(Cl)cccc1Cl)C#N
1.79	-0.363	1.176	N#CC(=Cc1cccc(c1)Cl)C#N
-0.62	-0.203	0.104	OCc1ccccc1
-0.29	0.338	-0.222	CCCCN
-2.21	-1.398	-2.253	NC(=O)/C=C/c1ccccc1
1.53	-0.082	1.804	N#C/C=C/c1ccccc1
0.48	-0.682	0.389	O=C1C=Cc2c(O1)cccc2
2.56	0.364	2.619	O=C1C(=C(Cl)C(=O)c2c1cccc2)Cl
0.03	-1.76	-2.354	CCOc1cc(C=O)ccc1O
-0.13	-0.255	-0.534	COc1cccc(c1)N
-2.44	-2.812	-2.53	Nc1cccc(c1)N
-0.1	2.306	1.831	[O]N(C1CCCCC1)[O]
-0.93	-0.825	-0.597	CN([O])[O]
0.67	-0.119	1.042	CN1C(=O)c2c(C1=O)cccc2
2.47	1.257	2.085	CN(c1ccccc1)C
0.52	-0.797	-0.224	COc1ccccc1N
0.55	1.495	-2.443	COP(=O)(C=C(Cl)Cl)OC
-1.65	-2.661	-3.534	Nc1ccccc1N
0.65	0.89	0.49	OC(=O)c1ccccc1C
-0.41	-1.077	-0.802	COc1ccc(cc1)N
-0.52	0.204	0.562	Fc1c(O)c(F)c(c(c1F)F)F
-1.46	-1.455	-0.483	O=C1NC(=O)c2c1cccc2
-2.81	-3.403	-2.639	Nc1ccc(cc1)N
1.56	1.313	2.023	N#Cc1ccc(cc1)C
-0.39	-1.31	0.126	O=C1C=CC(=O)C=C1
-0.75	-2.421	-3.236	COc1cc(C=O)ccc1O
